# Supplementary material for: Helicobacter pylori Avoids the Critical Activation of NLRP3 Inflammasome-Mediated Production of Oncogenic Mature IL-1β in Human Immune Cells
Source: PubMed Central journal article supplement (PMC7226495; doi:10.3390/cancers12040803), 2020-03-27
Supplement: cancers-12-00803-s001.pdf [file cancers-12-00803-s001.pdf]

# *Helicobacter pylori* Avoids the Critical Activation of NLRP3 Inflammasome-Mediated Production of Oncogenic Mature IL-1 $\beta$ in Human Immune Cells

Suneesh Kumar Pachathundikandi, Nicole Blaser, Heiko Bruns and Steffen Backert

Table 1. *H. pylori* wild-type strains and mutants used in this study.

| Name                       | Gene          | Function                                        | Resistance | Reference                                 |
|----------------------------|---------------|-------------------------------------------------|------------|-------------------------------------------|
| P1                         | wt            | <i>cagPAI</i> <sup>+</sup> type-I strain        | None       | [1]                                       |
| P12                        | wt            | <i>cagPAI</i> <sup>+</sup> type-I strain        | None       | [2]                                       |
| N6                         | wt            | <i>cagPAI</i> <sup>+</sup> type-I strain        | None       | [3]                                       |
| UK123                      | wt            | <i>cagPAI</i> <sup>-</sup> type-II strain       | None       | M. Achtman & S. Suerbaum<br>(unpublished) |
| UK097                      | wt            | <i>cagPAI</i> <sup>-</sup> type-II strain       | None       | M. Achtman & S. Suerbaum<br>(unpublished) |
| Ka148                      | wt            | <i>cagPAI</i> <sup>-</sup> type-II strain       | None       | [4]                                       |
| P1 $\Delta$ <i>napA</i>    | <i>napA</i>   | Neutrophil activating protein A                 | Chl        | [5]                                       |
| P1 $\Delta$ <i>ureA</i>    | <i>ureA</i>   | Urease subunit A                                | Chl        | This study                                |
| P1 $\Delta$ <i>vacA</i>    | <i>vacA</i>   | Vacuolating cytotoxin A                         | Kan        | [6]                                       |
| P12 $\Delta$ <i>cagA</i>   | <i>cagA</i>   | T4SS effector protein                           | Chl        | [7]                                       |
| P12 $\Delta$ <i>cagL</i>   | <i>cagL</i>   | T4SS tip protein, integrin binding              | Chl        | [8]                                       |
| P12 $\Delta$ <i>cagPAI</i> | <i>cagPAI</i> | Entire T4SS apparatus and effector protein CagA | Kan        | [9]                                       |
| P12 $\Delta$ <i>vacA</i>   | <i>vacA</i>   | Vacuolating cytotoxin A                         | Chl        | [6]                                       |
| P12 $\Delta$ <i>flaA</i>   | <i>flaA</i>   | Flagella monomer                                | Chl        | [7]                                       |
| P12 $\Delta$ <i>ggT</i>    | <i>ggT</i>    | $\gamma$ -glutamyl transferase                  | Chl        | This study                                |
| P12 $\Delta$ <i>hbp</i>    | <i>hbp</i>    | Phosphoheptose isomerase                        | Chl        | This study                                |
| P12 $\Delta$ <i>hopQ</i>   | <i>hopQ</i>   | Outer membrane protein and adhesin              | Chl        | [10]                                      |
| P12 $\Delta$ 1191          | <i>Hp1191</i> | Glycosyl-transferase                            | Kan        | [11]                                      |
| P12 $\Delta$ <i>cgt</i>    | <i>cgt</i>    | Cholesterol-glycosyl transferase                | Kan        | This study                                |
| P12 $\Delta$ <i>slt</i>    | <i>slt</i>    | Lytic murein transglycosylase                   | Chl        | This study                                |
| N6 $\Delta$ <i>htrA</i>    | <i>htrA</i>   | Secreted serine protease                        | Kan        | [12]                                      |

Abbreviations: Chl: Chloramphenicol, Kan: Kanamycin, wt: Wild-type

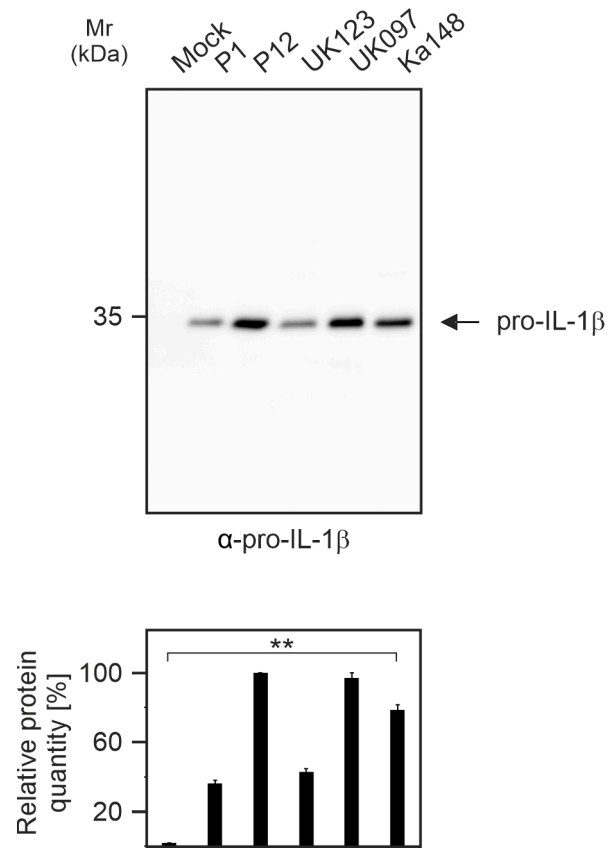

**Figure S1:** Full-size blot of Figure 1A and quantification of pro-IL-1 $\beta$  protein expression in *H. pylori*-infected THP1 monocytes. Shown is the blot of Figure 1A detecting pro-IL-1 $\beta$  using a specific antibody against pro-IL-1 $\beta$ . The band intensities were quantified using ImageLab Software version 5.0 and shown as relative intensities. The strongest band was set as 100 %. \*\* $p \leq 0.01$

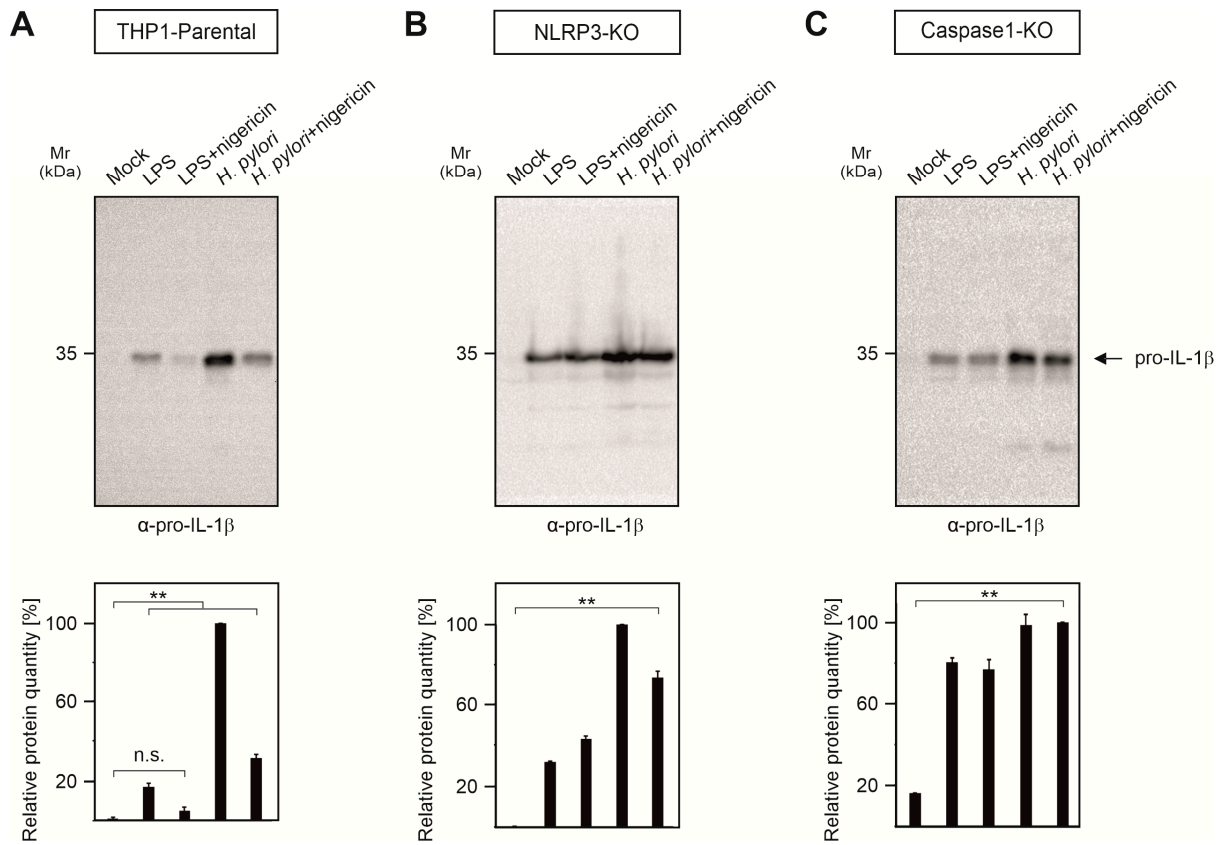

**Figure S2:** Full-size blots of Figure 3A and quantification of pro-IL-1 $\beta$  protein expression in THP1 parental (A), THP1 NLRP3-KO (B) and THP1 Caspase-1-KO (C) monocytes. After treatment of the cells with *E. coli* LPS, *H. pylori* infection and NLRP3 inflammasome activation by nigericin, pro-IL-1 $\beta$  protein expression was detected by Western blotting using a specific antibody. Using ImageLab Software version 5.0 the band intensities of pro-IL-1 $\beta$  were quantified and relative amounts are displayed. The strongest band in each blot was set as 100 %. \*\*  $p \leq 0.01$

**A**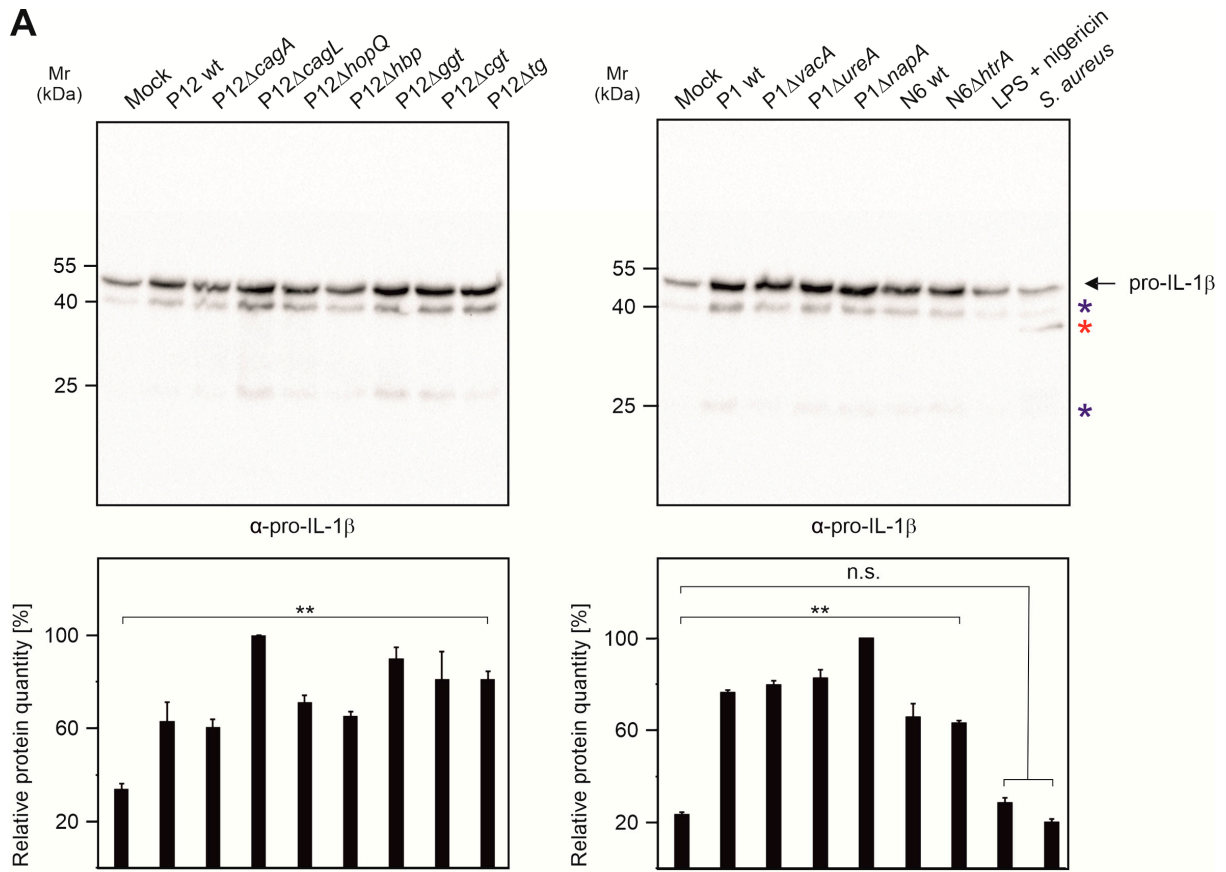**B**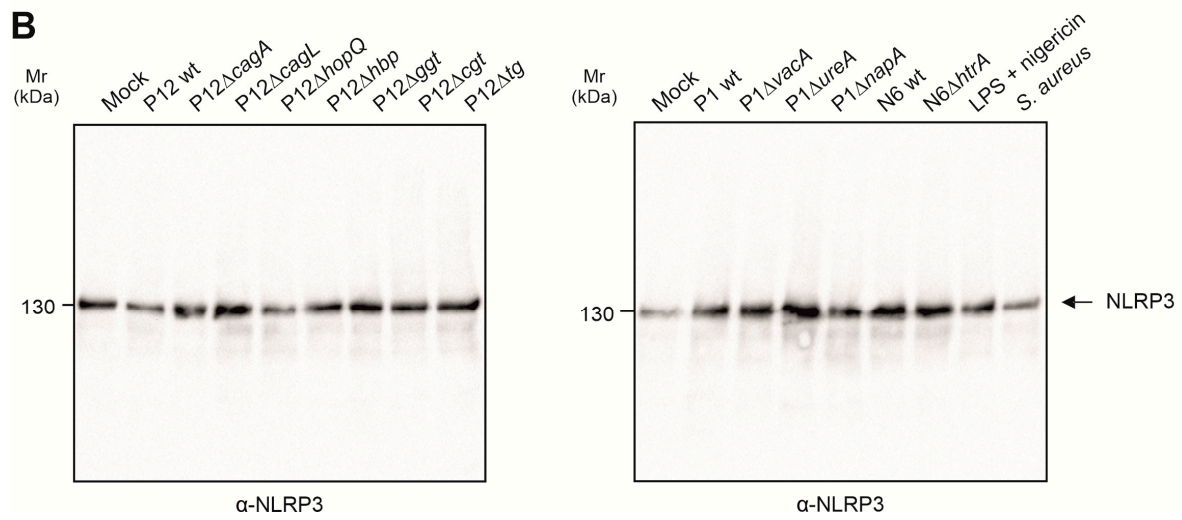**Figure S3:** To be continued.

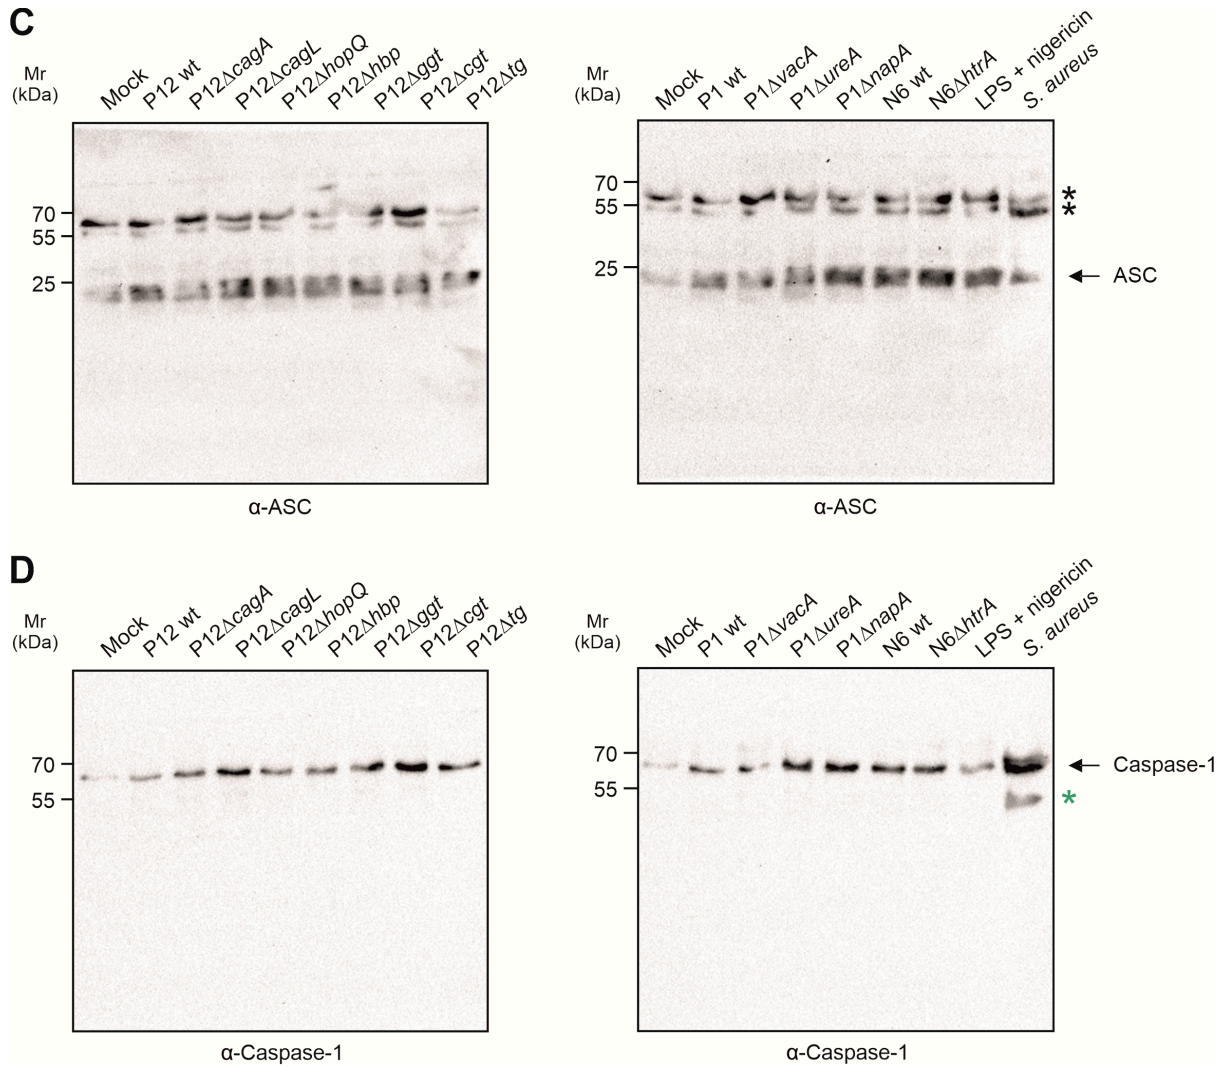

**Figure S3:** Full-size blots of Figure 7 and quantification of pro-IL-1 $\beta$  protein expression in *H. pylori*-infected HEK293-NLRP3-INSOME cells. These cells were infected with *H. pylori* deletion variants or the corresponding wt strains. In addition, these cells were treated with *E. coli* LPS and nigericin or infected with *S. aureus*. Using Western blotting the pro-IL-1 $\beta$  protein expression was detected by a specific antibody (A). A *S. aureus*-specific cleavage product of IL-1 $\beta$  was detected (red asterisk). Additionally, cross-reaction of the antibody led to bands of unknown origin with a molecular weight of 40 kDa and 25 kDa (blue asterisk). The band intensities of pro-IL-1 $\beta$  were quantified using ImageLab Software version 5.0 and shown as relative amounts. The strongest band was set as 100 %. As control, the protein expression of NLRP3 (B), ASC (C) and Caspase-1 (D) were investigated using specific antibodies. The antibody against ASC showed some cross-reactivity leading to a double band of unknown origin having a molecular weight between 55 kDa and 70 kDa (black asterisks). Detection of caspase-1 revealed a *S. aureus*-specific band with a molecular weight of 55 kDa (green asterisk). \*\*  $p \leq 0.01$

## References

1. Moese, S.; Selbach M.; Zimny-Arndt, U.; Jungblut P.R.; Meyer, T.F.; Backert, S. Identification of a tyrosine-phosphorylated 35 kDa carboxy-terminal fragment (p35CagA) of the *Helicobacter pylori* CagA protein in phagocytic cells: Processing or breakage? *Proteomics* **2001**, *1*, 618–629.
2. Fischer, W.; Windhager L.; Rohrer, S.; Zeiller, M.; Karnholz, A.; Hoffmann, R.; Zimmer, R.; Haas, R. Strain-specific genes of *Helicobacter pylori*: genome evolution driven by a novel type IV secretion system and genomic island transfer. *Nucleic Acids Res.* **2010**, *38*, 6089–6101.
3. Ferrero, R.L.; Cussac, V., Courcoux, P.; Labigne, A. Construction of isogenic urease-negative mutants of *Helicobacter pylori* by allelic exchange. *J. Bacteriol.* **1992**, *174*, 4212–4217.
4. Backert, S.; Schwarz, T.; Miehlke, S.; Kirsch, C.; Sommer, C.; Kwok, T.; Gerhard, M.; Goebel, U.B.; Lehn, N.; Koenig, W.; Meyer, T.F. Functional analysis of the cag pathogenicity island in *Helicobacter pylori* isolates from patients with gastritis, peptic ulcer, and gastric cancer. *Infect. Immun.* **2004**, *72*, 1043–56.
5. Brisslert, M.; Enarsson, K.; Lundin, S.; Karlsson, A.; Kusters, J.G.; Svennerholm, A.M.; Backert, S.; Quiding-Järbrink, M. *Helicobacter pylori* induce neutrophil transendothelial migration: role of the bacterial HP-NAP. *FEMS Microbiol Lett.* **2005**, *249*(1), 95-103.
6. Tegtmeier, N.; Harrer, A.; Schmitt, V.; Singer, B.B.; Backert, S. Expression of CEACAM1 or CEACAM5 in AZ-521 cells restores the type IV secretion deficiency for translocation of CagA by *Helicobacter pylori*. *Cell Microbiol.* **2019**, *21*(1), e12965.
7. Pachathundikandi, S.K.; Tegtmeier, N.; Arnold, I.C.; Lind, J.; Neddermann, M.; Falkeis-Veits, C.; Chattopadhyay, S.; Brönstrup, M.; Tegge, W.; Hong, M.; Sticht, H.; Vieth, M.; Müller, A.; Backert, S. T4SS-dependent TLR5 activation by *Helicobacter pylori* infection. *Nat Commun.* **2019**, *10*(1), 5717.
8. Kwok, T.; Zabler, D.; Urman, S.; Rohde, M.; Hartig, R.; Wessler, S.; Misselwitz, R.; Berger, J.; Sewald, N.; König, W.; Backert, S. *Helicobacter* exploits integrin for type IV secretion and kinase activation. *Nature.* **2007**, *449*(7164), 862-6.
9. Backert, S.; Kwok, T.; Schmid, M.; Selbach, M.; Moese, S.; Peek, R.M. Jr; König, W.; Meyer, T.F.; Jungblut, P.R. Subproteomes of soluble and structure-bound *Helicobacter pylori* proteins analyzed by two-dimensional gel electrophoresis and mass spectrometry. *Proteomics.* **2005**, *5*(5), 1331-45.
10. Moonens, K.; Hamway, Y.; Neddermann, M.; Reschke, M.; Tegtmeier, N.; Kruse, T.; Kammerer, R.; Mejías-Luque, R.; Singer, B.B.; Backert, S.; Gerhard, M.; Remaut, H. *Helicobacter pylori* adhesin HopQ disrupts *trans* dimerization in human CEACAMs. *EMBO J.* **2018**, *37*(13).
11. Dolan, B.; Naughton, J.; Tegtmeier, N.; May, F.E.; Clyne, M. The interaction of *Helicobacter pylori* with the adherent mucus gel layer secreted by polarized HT29-MTX-E12 cells. *PLoS One.* **2012**, *7*(10), e47300.
12. Zawilak-Pawlik, A.; Zarzecka, U.; Żyła-Uklejewicz, D.; Lach, J.; Strapagiel, D.; Tegtmeier, N.; Böhm, M.; Backert, S.; Skorko-Glonek, J. Establishment of serine protease htrA mutants in *Helicobacter pylori* is associated with secA mutations. *Sci Rep.* **2019**, *9*, 11794.
